# Supplementary material for: The puzzling influence of Ophiomorpha (trace fossil) on reservoir porosity: X-ray microtomography analysis
Source: Frontiers journal article supplement (doi:10.3389/feart.2022.1010729), 2022-11-17
Supplement: Table_1.XLSX [file Table_1.XLSX]

## Sheet: Hoja1
Host Sediment	Peloidal Wall	Burrow Fill
4.766	0.915	2.26
2.425	0.358	2.327
3.333	0.339	1.768
3.343	1.517	1.964
3.426	0	1.804
1.589	0.198	2.838
2.847	0.013	1.899
2.833	0.484	2.557
4.067	0.239	1.923
0.714	0.216	2.178
3.009	0	2.063
4.147	0.241	2.514
1.591	1.297	2.506
0.245	0.729	1.923
3.88	0.295	1.929
4.293	0	2.783
1.541	0	2.608
2.229	0.01	2.134
1.605	0.317	1.985
3.085	0	1.719
2.34	0.707	2.695
5.0043	0.96075	2.373
2.54625	0.3759	2.44335
3.49965	0.35595	1.8564
3.51015	1.59285	2.0622
3.5973	0	1.8942
1.66845	0.2079	2.9799
2.98935	0.01365	1.99395
2.97465	0.5082	2.68485
4.27035	0.25095	2.01915
0.7497	0.2268	2.2869
3.15945	0	2.16615
4.35435	0.25305	2.6397
1.67055	1.36185	2.6313
0.25725	0.76545	2.01915
4.074	0.30975	2.02545
4.50765	0	2.92215
1.61805	0	2.7384
2.34045	0.0105	2.2407
1.68525	0.33285	2.08425
3.23925	0	1.80495
2.457	0.74235	2.82975
4.5277	0.86925	2.147
2.30375	0.3401	2.21065
3.16635	0.32205	1.6796
3.17585	1.44115	1.8658
3.2547	0	1.7138
1.50955	0.1881	2.6961
2.70465	0.01235	1.80405
2.69135	0.4598	2.42915
3.86365	0.22705	1.82685
0.6783	0.2052	2.0691
2.85855	0	1.95985
3.93965	0.22895	2.3883
1.51145	1.23215	2.3807
0.23275	0.69255	1.82685
3.686	0.28025	1.83255
4.07835	0	2.64385
1.46395	0	2.4776
2.11755	0.0095	2.0273
1.52475	0.30115	1.88575
2.93075	0	1.63305
2.223	0.67165	2.56025
5.33792	1.0248	2.5312
2.716	0.40096	2.60624
3.73296	0.37968	1.98016
3.74416	1.69904	2.19968
3.83712	0	2.02048
1.77968	0.22176	3.17856
3.18864	0.01456	2.12688
3.17296	0.54208	2.86384
4.55504	0.26768	2.15376
0.79968	0.24192	2.43936
3.37008	0	2.31056
4.64464	0.26992	2.81568
1.78192	1.45264	2.80672
0.2744	0.81648	2.15376
4.3456	0.3304	2.16048
4.80816	0	3.11696
1.72592	0	2.92096
2.49648	0.0112	2.39008
1.7976	0.35504	2.2232
3.4552	0	1.92528
2.6208	0.79184	3.0184
4.19408	0.8052	1.9888
2.134	0.31504	2.04776
2.93304	0.29832	1.55584
2.94184	1.33496	1.72832
3.01488	0	1.58752
1.39832	0.17424	2.49744
2.50536	0.01144	1.67112
2.49304	0.42592	2.25016
3.57896	0.21032	1.69224
0.62832	0.19008	1.91664
2.64792	0	1.81544
3.64936	0.21208	2.21232
1.40008	1.14136	2.20528
0.2156	0.64152	1.69224
3.4144	0.2596	1.69752
3.77784	0	2.44904
1.35608	0	2.29504
1.96152	0.0088	1.87792
1.4124	0.27896	1.7468
2.7148	0	1.51272
2.0592	0.62216	2.3716
4.90898	0.94245	2.3278
2.49775	0.36874	2.39681
3.43299	0.34917	1.82104
3.44329	1.56251	2.02292
3.52878	0	1.85812
1.63667	0.20394	2.92314
2.93241	0.01339	1.95597
2.91799	0.49852	2.63371
4.18901	0.24617	1.98069
0.73542	0.22248	2.24334
3.09927	0	2.12489
4.27141	0.24823	2.58942
1.63873	1.33591	2.58118
0.25235	0.75087	1.98069
3.9964	0.30385	1.98687
4.42179	0	2.86649
1.58723	0	2.68624
2.29587	0.0103	2.19802
1.65315	0.32651	2.04455
3.17755	0	1.77057
2.4102	0.72821	2.77585
4.34557	0.39655	2.46788
6.01	0.904	1.565
2.322	0.273	7.783
3.578	2.056	8.969
5.343	1.826	6.493
4.944	0.384	2.744
3.809	0.363	4.258
10.099	0.122	12.847
5.7	0.736	6.337
2.855	0.284	6.15
8.623	1.239	2.483
4.982	0.409	1.344
8.168	1.117	4.169
3.317	0.994	2.65
9.063	0.133	11.86
9.219	2.255	4.545
6.838	3.347	15.612
2.407	0.528	2.283
7.45	1.297	6.085
9.636	1.667	1.694
5.411	1.476	3.075
5.345	0.079	1.126
6.826	2.27	2.689
6.3105	0.9492	1.64325
2.4381	0.28665	8.17215
3.7569	2.1588	9.41745
5.61015	1.9173	6.81765
5.1912	0.4032	2.8812
3.99945	0.38115	4.4709
10.604	0.1281	13.4893
5.985	0.7728	6.65385
2.99775	0.2982	6.4575
9.05415	1.30095	2.60715
5.2311	0.42945	1.4112
8.5764	1.17285	4.37745
3.48285	1.0437	2.7825
9.51615	0.13965	12.453
9.67995	2.36775	4.77225
7.1799	3.51435	16.3926
2.52735	0.5544	2.39715
7.8225	1.36185	6.38925
10.1178	1.75035	1.7787
5.68155	1.5498	3.22875
5.61225	0.08295	1.1823
7.1673	2.3835	2.82345
5.7095	0.8588	1.48675
2.2059	0.25935	7.39385
3.3991	1.9532	8.52055
5.07585	1.7347	6.16835
4.6968	0.3648	2.6068
3.61855	0.34485	4.0451
9.59405	0.1159	12.2046
5.415	0.6992	6.02015
2.71225	0.2698	5.8425
8.19185	1.17705	2.35885
4.7329	0.38855	1.2768
7.7596	1.06115	3.96055
3.15115	0.9443	2.5175
8.60985	0.12635	11.267
8.75805	2.14225	4.31775
6.4961	3.17965	14.8314
2.28665	0.5016	2.16885
7.0775	1.23215	5.78075
9.1542	1.58365	1.6093
5.14045	1.4022	2.92125
5.07775	0.07505	1.0697
6.4847	2.1565	2.55455
5.8297	0.87688	1.51805
2.25234	0.26481	7.54951
3.47066	1.99432	8.69993
5.18271	1.77122	6.29821
4.79568	0.37248	2.66168
3.69473	0.35211	4.13026
9.79603	0.11834	12.4616
5.529	0.71392	6.14689
2.76935	0.27548	5.9655
8.36431	1.20183	2.40851
4.83254	0.39673	1.30368
7.92296	1.08349	4.04393
3.21749	0.96418	2.5705
8.79111	0.12901	11.5042
8.94243	2.18735	4.40865
6.63286	3.24659	15.1436
2.33479	0.51216	2.21451
7.2265	1.25809	5.90245
9.34692	1.61699	1.64318
5.24867	1.43172	2.98275
5.18465	0.07663	1.09222
6.62122	2.2019	2.60833
3.809	0.378	5.063
2.659	0.685	2.634
2.169	1.73	2.449
3.561	0.021	2.201
3.526	0.245	11.914
3	0.071	3.277
5.853	0.109	3.634
3.047	0.223	3.284
1.429	0.098	5.98
4.063	0.926	12.961
3.031	0	2.383
2.73	0	5.927
1.684	1.001	11.8
0.943	0.28	2.473
3.007	0.127	3.627
3.914	0	7.37
3.516	0.012	2.843
1.697	1.487	3.197
4.049	0.901	1.349
2.991	0.127	1.244
2.349	0.71	3.261
4.275	1.754	1.23
1.86	0.016	4.157
3.99945	0.3969	5.31615
2.79195	0.71925	2.7657
2.27745	1.8165	2.57145
3.73905	0.02205	2.31105
3.7023	0.25725	12.5097
3.15	0.07455	3.44085
6.14565	0.11445	3.8157
3.19935	0.23415	3.4482
1.50045	0.1029	6.279
4.26615	0.9723	13.6091
3.18255	0	2.50215
2.8665	0	6.22335
1.7682	1.05105	12.39
0.99015	0.294	2.59665
3.15735	0.13335	3.80835
4.1097	0	7.7385
3.6918	0.0126	2.98515
1.78185	1.56135	3.35685
4.25145	0.94605	1.41645
3.14055	0.13335	1.3062
2.46645	0.7455	3.42405
4.48875	1.8417	1.2915
1.953	0.0168	4.36485
3.61855	0.3591	4.80985
2.52605	0.65075	2.5023
2.06055	1.6435	2.32655
3.38295	0.01995	2.09095
3.3497	0.23275	11.3183
2.85	0.06745	3.11315
5.56035	0.10355	3.4523
2.89465	0.21185	3.1198
1.35755	0.0931	5.681
3.85985	0.8797	12.3129
2.87945	0	2.26385
2.5935	0	5.63065
1.5998	0.95095	11.21
0.89585	0.266	2.34935
2.85665	0.12065	3.44565
3.7183	0	7.0015
3.3402	0.0114	2.70085
1.61215	1.41265	3.03715
3.84655	0.85595	1.28155
2.84145	0.12065	1.1818
2.23155	0.6745	3.09795
4.06125	1.6663	1.1685
1.767	0.0152	3.94915
1.705	0.875	3.802
0.194	0.101	5.168
2.652	0.187	1.152
0.707	0.247	4.996
2.739	0.016	3.804
0.543	0.354	6.498
1.82	0	1.791
0.192	1.196	8.778
2.058	0.173	3.956
0.977	0	1.607
1.976	0	9.079
0.007	0	2.532
1.106	0	0.957
0.975	0.212	5.137
2.006	0.27	2.469
1.84	0.19	3.117
0.007	0.26	3.949
0.008	0.029	3.314
1.564	0	0.908
2.01	0.016	1.256
0.5	0.157	6.867
3.455	0.388	3.292
1.79025	0.91875	3.9921
0.2037	0.10605	5.4264
2.7846	0.19635	1.2096
0.74235	0.25935	5.2458
2.87595	0.0168	3.9942
0.57015	0.3717	6.8229
1.911	0	1.88055
0.2016	1.2558	9.2169
2.1609	0.18165	4.1538
1.02585	0	1.68735
2.0748	0	9.53295
0.00735	0	2.6586
1.1613	0	1.00485
1.02375	0.2226	5.39385
2.1063	0.2835	2.59245
1.932	0.1995	3.27285
0.00735	0.273	4.14645
0.0084	0.03045	3.4797
1.6422	0	0.9534
2.1105	0.0168	1.3188
0.525	0.16485	7.21035
3.62775	0.4074	3.4566
1.61975	0.83125	3.6119
0.1843	0.09595	4.9096
2.5194	0.17765	1.0944
0.67165	0.23465	4.7462
2.60205	0.0152	3.6138
0.51585	0.3363	6.1731
1.729	0	1.70145
0.1824	1.1362	8.3391
1.9551	0.16435	3.7582
0.92815	0	1.52665
1.8772	0	8.62505
0.00665	0	2.4054
1.0507	0	0.90915
0.92625	0.2014	4.88015
1.9057	0.2565	2.34555
1.748	0.1805	2.96115
0.00665	0.247	3.75155
0.0076	0.02755	3.1483
1.4858	0	0.8626
1.9095	0.0152	1.1932
0.475	0.14915	6.52365
3.28225	0.3686	3.1274
3.121	0.755	3.019
2.104	0.39	6.29
2.902	0.18	2.235
2.174	0.296	2.844
2.724	1.557	1.669
2.241	0.01	7.303
2.717	0.027	9.806
4.039	0.304	3.486
2.069	2.156	3.535
2.422	0.294	7.301
3.455	0	1.418
3.722	0.191	2.488
2.757	0.731	10.793
3.063	0.935	2.44
2.801	0.078	7.422
2.128	0.138	2.421
3.013	0.033	4.059
2.107	0.827	5.704
1.999	0.151	2.684
3.72	0.234	4.951
2.353	0.388	2.457
7.57	0.15	2.11
3.27705	0.79275	3.16995
2.2092	0.4095	6.6045
3.0471	0.189	2.34675
2.2827	0.3108	2.9862
2.8602	1.63485	1.75245
2.35305	0.0105	7.66815
2.85285	0.02835	10.2963
4.24095	0.3192	3.6603
2.17245	2.2638	3.71175
2.5431	0.3087	7.66605
3.62775	0	1.4889
3.9081	0.20055	2.6124
2.89485	0.76755	11.3326
3.21615	0.98175	2.562
2.94105	0.0819	7.7931
2.2344	0.1449	2.54205
3.16365	0.03465	4.26195
2.21235	0.86835	5.9892
2.09895	0.15855	2.8182
3.906	0.2457	5.19855
2.47065	0.4074	2.57985
7.9485	0.1575	2.2155
2.96495	0.71725	2.86805
1.9988	0.3705	5.9755
2.7569	0.171	2.12325
2.0653	0.2812	2.7018
2.5878	1.47915	1.58555
2.12895	0.0095	6.93785
2.58115	0.02565	9.3157
3.83705	0.2888	3.3117
1.96555	2.0482	3.35825
2.3009	0.2793	6.93595
3.28225	0	1.3471
3.5359	0.18145	2.3636
2.61915	0.69445	10.2533
2.90985	0.88825	2.318
2.66095	0.0741	7.0509
2.0216	0.1311	2.29995
2.86235	0.03135	3.85605
2.00165	0.78565	5.4188
1.89905	0.14345	2.5498
3.534	0.2223	4.70345
2.23535	0.3686	2.33415
7.1915	0.1425	2.0045
4.201	0	2.123
5.204	0.215	2.185
6.715	0.772	5.107
4.98	0.296	3.779
6.039	0.426	2.636
4.599	1.685	2.449
7.989	0.013	2.787
2.725	0.248	5.312
6.231	0	4.885
11.518	0.731	2.866
5.588	0.131	2.665
0.742	0.165	4.859
4.049	0.115	4.131
1.884	0.825	3.671
3.288	0.483	2.428
1.129	0.09	4.599
0.493	0.722	3.202
1.066	0.718	1.753
1.157	0.615	2.336
2.813	0.138	1.979
0.986	0	3.688
2.214	0	1.165
3.724	1.398	0.52
2.139	1.25	0.399
2.833	0.255	1.025
2.346	1.315	0.05
3.418	2.344	0.828
1.99	2.245	0.893
1.945	3.84	0.666
3.957	0.947	0.42
2.336	0.522	0.244
1.671	0.231	0.237
0.864	1.238	0.305
1.402	0.469	0.355
2.027	1.758	3.444
2.823	0.463	0.931
2.025	0.926	1.059
3.011	0	0.037
1.447	0	0.528
3.452	0.093	0.138
1.012	0.058	0.841
2.958	0.044	0.415
4.319	0.012	0.025
4.41105	0	2.22915
5.4642	0.22575	2.29425
7.05075	0.8106	5.36235
5.229	0.3108	3.96795
6.34095	0.4473	2.7678
4.82895	1.76925	2.57145
8.38845	0.01365	2.92635
2.86125	0.2604	5.5776
6.54255	0	5.12925
12.0939	0.76755	3.0093
5.8674	0.13755	2.79825
0.7791	0.17325	5.10195
4.25145	0.12075	4.33755
1.9782	0.86625	3.85455
3.4524	0.50715	2.5494
1.18545	0.0945	4.82895
0.51765	0.7581	3.3621
1.1193	0.7539	1.84065
1.21485	0.64575	2.4528
2.95365	0.1449	2.07795
1.0353	0	3.8724
2.3247	0	1.22325
3.9102	1.4679	0.546
2.24595	1.3125	0.41895
2.97465	0.26775	1.07625
2.4633	1.38075	0.0525
3.5889	2.4612	0.8694
2.0895	2.35725	0.93765
2.04225	3.717	0.6993
4.15485	0.99435	0.441
2.4528	0.5481	0.2562
1.75455	0.24255	0.24885
0.9072	1.2999	0.32025
1.4721	0.49245	0.37275
2.12835	1.8459	3.6162
2.96415	0.48615	0.97755
2.12625	0.9723	1.11195
3.16155	0	0.03885
1.51935	0	0.5544
3.6246	0.09765	0.1449
1.0626	0.0609	0.88305
3.1059	0.0462	0.43575
4.53495	0.0126	0.02625
3.99095	0	2.01685
4.9438	0.20425	2.07575
6.37925	0.7334	4.85165
4.731	0.2812	3.59005
5.73705	0.4047	2.5042
4.36905	1.60075	2.32655
7.58955	0.01235	2.64765
2.58875	0.2356	5.0464
5.91945	0	4.64075
10.9421	0.69445	2.7227
5.3086		2.53175
0.7049		4.61605
3.84655		3.92445
1.7898		3.48745
3.1236		2.3066
1.07255		4.36905
0.46835		3.0419
1.0127		1.66535
1.09915		2.2192
2.67235		1.88005
0.9367		3.5036
2.1033		1.10675
3.5378		0.494
2.03205		0.37905
2.69135		0.97375
2.2287		0.0475
3.2471		0.7866
1.8905		0.84835
1.84775		0.6327
3.75915		0.399
2.2192		0.2318
1.58745		0.22515
0.8208		0.28975
1.3319		0.33725
1.92565		3.2718
2.68185		0.88445
1.92375		1.00605
2.86045		0.03515
1.37465		0.5016
3.2794		0.1311
0.9614		0.79895
2.8101		0.39425
4.10305		0.02375
1.85455		0.043
0.92234		3.365
3.34883
1.14989
0.502121
1.08572
1.1784
2.86504
1.00424
2.25496
3.79289
2.17857
2.88541
2.3894
3.48123
2.02682
1.98098
4.0302
2.37922
1.70191
0.879984
1.42794
